# Supplementary material for: Disentangling the Taxonomic Status of Caprella penantis sensu stricto (Amphipoda: Caprellidae) Using an Integrative Approach
Source: MDPI journal article supplement (doi:10.3390/life12020155), 2022-01-21
Supplement: s1 [file s1]

**Figure S1.** Maximum likelihood tree of *Caprella penantis sensu stricto* and related taxa based on mitochondrial COI sequences. Bootstrap support above 50 are indicated. Clades VA – VC are identified. The tree was rooted with *C. simia* and *C. linearis* (sequences available in GenBank: KF743437 and FJ581572, respectively). The two haplotypes (H40 and H41) from Viana do Castelo grouped in the Clade VB are highlighted in bold.
