# Supplementary material for: Disentangling the Taxonomic Status of Caprella penantis sensu stricto (Amphipoda: Caprellidae) Using an Integrative Approach
Source: MDPI journal article supplement (doi:10.3390/life12020155), 2022-01-21
Supplement: s1 [file s1]

**Table S3.** Results of AMOVA tests comparing variation in COI sequences for each phylogenetic clade (10,100 permutations). Region definition for Clade VA: continental Portugal (Alteirinhos, Viana do Castelo, Mindelo, Labruge, Castelejo and Praia Azul) and the Strait of Gibraltar (Torreguadiaro, Tarifa Island, Puerto de Ceuta, Grottes d'Hercules, Ksar-es Seghir, Estepona, El Chorrillo, Punta Carnero, Benzú and Punta Almina); and for *Caprella penantis sensu stricto* (Clade VB): UK (Sidmouth and St. Ives), Northern Spain (Baleo, Cetarea, Oyambre), Azores (Monte da Guia) and continental Portugal (Viana do Castelo).

| Species                                           | Source of variation              | d.f. | Sum of squares | Variance components | Percentage of variation | Fct     | Fsc     | Fst     | P       |
|---------------------------------------------------|----------------------------------|------|----------------|---------------------|-------------------------|---------|---------|---------|---------|
| Clade VA                                          | Among regions                    | 1    | 104.252        | 2.28487             | 46.49                   | 0.46486 |         |         | 0.00020 |
|                                                   | Among populations within regions | 15   | 138.737        | 1.90766             | 38.81                   |         | 0.72528 |         | 0.00000 |
|                                                   | Within populations               | 63   | 45.523         | 0.72259             | 14.70                   |         |         | 0.85299 | 0.00000 |
|                                                   | Total                            | 79   | 288.512        | 4.91512             | 100.00                  |         |         |         |         |
| <i>Caprella penantis sensu stricto</i> (Clade VB) | Among regions                    | 3    | 75.499         | 1.00479             | 22.30                   | 0.22297 |         |         | 0.03188 |
|                                                   | Among populations within regions | 3    | 30.055         | 0.89971             | 19.97                   |         | 0.25695 |         | 0.00000 |
|                                                   | Within populations               | 58   | 150.907        | 2.60185             | 57.73                   |         |         | 0.42263 | 0.00000 |
|                                                   | Total                            | 64   | 256.462        | 4.50635             | 100.00                  |         |         |         |         |
