# Supplementary material for: Disentangling the Taxonomic Status of Caprella penantis sensu stricto (Amphipoda: Caprellidae) Using an Integrative Approach
Source: MDPI journal article supplement (doi:10.3390/life12020155), 2022-01-21
Supplement: s1 [file s1]

**Table S4.** Pairwise Fst values between locations for each phylogenetic clade, based on 537 bp of mitochondrial cytochrome c oxidase subunit I gene. Only locations with three or more sequences were used. Significant values for  $P < 0.05$ , obtained through 10,000 permutations, are depicted in bold. Negative values not shown (n.s.).

| Clade VA             |                    |                |                |                |                |                |                |                |                |                |                |                |                |                |                |                |                |               |
|----------------------|--------------------|----------------|----------------|----------------|----------------|----------------|----------------|----------------|----------------|----------------|----------------|----------------|----------------|----------------|----------------|----------------|----------------|---------------|
| REGION               | LOCALITION         | V. Castelo     | Alteirinhos    | P. Azul        | Castelejo      | Labruge        | Mindelo        | P. Almina      | Benzú          | P. Carnero     | El Chorrillo   | Estepona       | G. d'Hercules  | K. Seghir      | P. Ceuta       | Tarifa I.      | Tarifa I. 2    | Torreguadiaro |
| Continental Portugal | Viana do Castelo   | 0.00000        |                |                |                |                |                |                |                |                |                |                |                |                |                |                |                |               |
|                      | Alteirinhos        | <b>0.78661</b> | 0.00000        |                |                |                |                |                |                |                |                |                |                |                |                |                |                |               |
|                      | Praia Azul         | <b>0.83266</b> | <b>0.91847</b> | 0.00000        |                |                |                |                |                |                |                |                |                |                |                |                |                |               |
|                      | Castelejo          | <b>0.75408</b> | n.s.           | <b>1.00000</b> | 0.00000        |                |                |                |                |                |                |                |                |                |                |                |                |               |
|                      | Labruge            | <b>0.50638</b> | <b>0.89933</b> | 0.92857        | <b>0.91489</b> | 0.00000        |                |                |                |                |                |                |                |                |                |                |                |               |
|                      | Mindelo            | <b>0.38829</b> | <b>0.88931</b> | <b>0.92771</b> | <b>0.90909</b> | 0.37615        | 0.00000        |                |                |                |                |                |                |                |                |                |                |               |
| Strait of Gibraltar  | Punta Almina       | <b>0.81267</b> | <b>0.90090</b> | <b>0.89427</b> | <b>0.88235</b> | <b>0.84049</b> | <b>0.84906</b> | 0.00000        |                |                |                |                |                |                |                |                |                |               |
|                      | Benzú              | <b>0.86196</b> | <b>0.95198</b> | <b>1.00000</b> | <b>1.00000</b> | <b>0.94805</b> | <b>0.94737</b> | 0.00000        | 0.00000        |                |                |                |                |                |                |                |                |               |
|                      | Punta Carnero      | <b>0.82959</b> | <b>0.89071</b> | 0.87879        | <b>0.86441</b> | 0.83784        | <b>0.85401</b> | <b>0.37615</b> | <b>0.57895</b> | 0.00000        |                |                |                |                |                |                |                |               |
|                      | El Chorrillo       | <b>0.84223</b> | <b>0.93728</b> | 0.97059        | <b>0.96787</b> | 0.90625        | <b>0.91201</b> | n.s.           | 0.11111        | 0.44444        | 0.00000        |                |                |                |                |                |                |               |
|                      | Estepona           | <b>0.88776</b> | <b>0.96219</b> | 1.00000        | <b>1.00000</b> | 0.95000        | <b>0.95219</b> | <b>0.70732</b> | <b>1.00000</b> | 0.76471        | 0.90000        | 0.00000        |                |                |                |                |                |               |
|                      | Grottes d'Hercules | <b>0.74117</b> | <b>0.79128</b> | 0.79167        | <b>0.72414</b> | 0.75000        | <b>0.76938</b> | <b>0.73611</b> | <b>0.84906</b> | 0.66667        | 0.78571        | 0.86111        | 0.00000        |                |                |                |                |               |
|                      | Ksar-es Seghir     | <b>0.78243</b> | <b>0.83388</b> | 0.78125        | <b>0.74888</b> | 0.73000        | <b>0.77542</b> | <b>0.75202</b> | <b>0.83673</b> | 0.68571        | 0.77778        | 0.82500        | 0.21739        | 0.00000        |                |                |                |               |
|                      | Puerto de Ceuta    | <b>0.84213</b> | <b>0.92845</b> | <b>0.94805</b> | <b>0.94118</b> | <b>0.89522</b> | <b>0.90000</b> | 0.00000        | 0.00000        | <b>0.45946</b> | n.s.           | <b>0.83099</b> | <b>0.79396</b> | <b>0.78827</b> | 0.00000        |                |                |               |
|                      | Tarifa Island      | <b>0.75084</b> | <b>0.76265</b> | <b>0.72450</b> | <b>0.67092</b> | <b>0.72277</b> | <b>0.72923</b> | <b>0.29160</b> | <b>0.31903</b> | n.s.           | <b>0.26899</b> | <b>0.55630</b> | <b>0.57721</b> | <b>0.64055</b> | <b>0.30887</b> | 0.00000        |                |               |
|                      | Tarifa Island 2    | <b>0.86564</b> | <b>0.94115</b> | 1.00000        | <b>1.00000</b> | 0.94118        | <b>0.94313</b> | <b>0.70732</b> | <b>1.00000</b> | 0.42857        | 0.90000        | 1.00000        | 0.79167        | 0.78125        | <b>0.83099</b> | 0.17523        | 0.00000        |               |
|                      | Torreguadiaro      | <b>0.89492</b> | <b>0.95811</b> | <b>0.98127</b> | <b>0.97962</b> | <b>0.94606</b> | <b>0.94815</b> | <b>0.73721</b> | <b>0.92895</b> | <b>0.79603</b> | <b>0.8607</b>  | n.s.           | <b>0.8846</b>  | <b>0.86147</b> | <b>0.82115</b> | <b>0.61131</b> | <b>0.95723</b> | 0.00000       |

**Caprella penantis sensu stricto (Clade VB)**

| REGIONS              | LOCALITION       | Sidmouth       | St. Ives       | Baleo          | Cetarea        | Oyambre        | M. Guia        | V. Castelo |
|----------------------|------------------|----------------|----------------|----------------|----------------|----------------|----------------|------------|
| UK                   | Sidmouth         | 0.00000        |                |                |                |                |                |            |
|                      | St. Ives         | <b>0.27605</b> | 0.00000        |                |                |                |                |            |
| Northern Spain       | Baleo            | <b>0.70614</b> | <b>0.31587</b> | 0.00000        |                |                |                |            |
|                      | Cetarea          | <b>0.70376</b> | <b>0.29935</b> | <b>0.62791</b> | 0.00000        |                |                |            |
|                      | Oyambre          | <b>0.60551</b> | <b>0.32001</b> | <b>0.43674</b> | 0.15544        | 0.00000        |                |            |
| Azores               | Monte da Guia    | <b>0.49462</b> | <b>0.36487</b> | <b>0.25916</b> | <b>0.37500</b> | <b>0.36770</b> | 0.00000        |            |
| Continental Portugal | Viana do Castelo | <b>0.68633</b> | <b>0.27836</b> | <b>0.35135</b> | 0.45000        | <b>0.36881</b> | <b>0.24696</b> | 0.00000    |
