# Supplementary material for: Disentangling the Taxonomic Status of Caprella penantis sensu stricto (Amphipoda: Caprellidae) Using an Integrative Approach
Source: MDPI journal article supplement (doi:10.3390/life12020155), 2022-01-21
Supplement: s1 [file s1]

**Table S2.** Morphological characters distinguishing adult males of *Caprella penantis sensu stricto* (s.s.) (Clade VB), Clade VA and Clade VC. Distribution locations of each clade is also provided.

|                                  | <i>Caprella penantis</i> s.s (Clade VB)                        | Clade VA                                                                 | Clade VC                                                 |
|----------------------------------|----------------------------------------------------------------|--------------------------------------------------------------------------|----------------------------------------------------------|
| <b>Gnathopods 2</b>              | Elongated with abundant setae and a larger proximal projection | Rounded with less setae and a smaller proximal projection                | Rounded with some setae and a larger proximal projection |
| <b>Gills</b>                     | Small and elongated                                            | Big and rounded                                                          | Big and rounded                                          |
| • Length / Width:                | 2.5                                                            | 1.5                                                                      | 1.5                                                      |
| • Length pereonite / length gill | 2                                                              | 1                                                                        | 1                                                        |
| <b>Distribution</b>              | UK, Northern Spain, and Azores (Portugal)                      | Continental Portugal, Strait of Gibraltar, and Temara (Atlantic Morocco) | Safi (Atlantic Morocco)                                  |
