# Supplementary figures and images for: Disentangling the Taxonomic Status of Caprella penantis sensu stricto (Amphipoda: Caprellidae) Using an Integrative Approach
Source: MDPI journal article supplement (doi:10.3390/life12020155), 2022-01-21

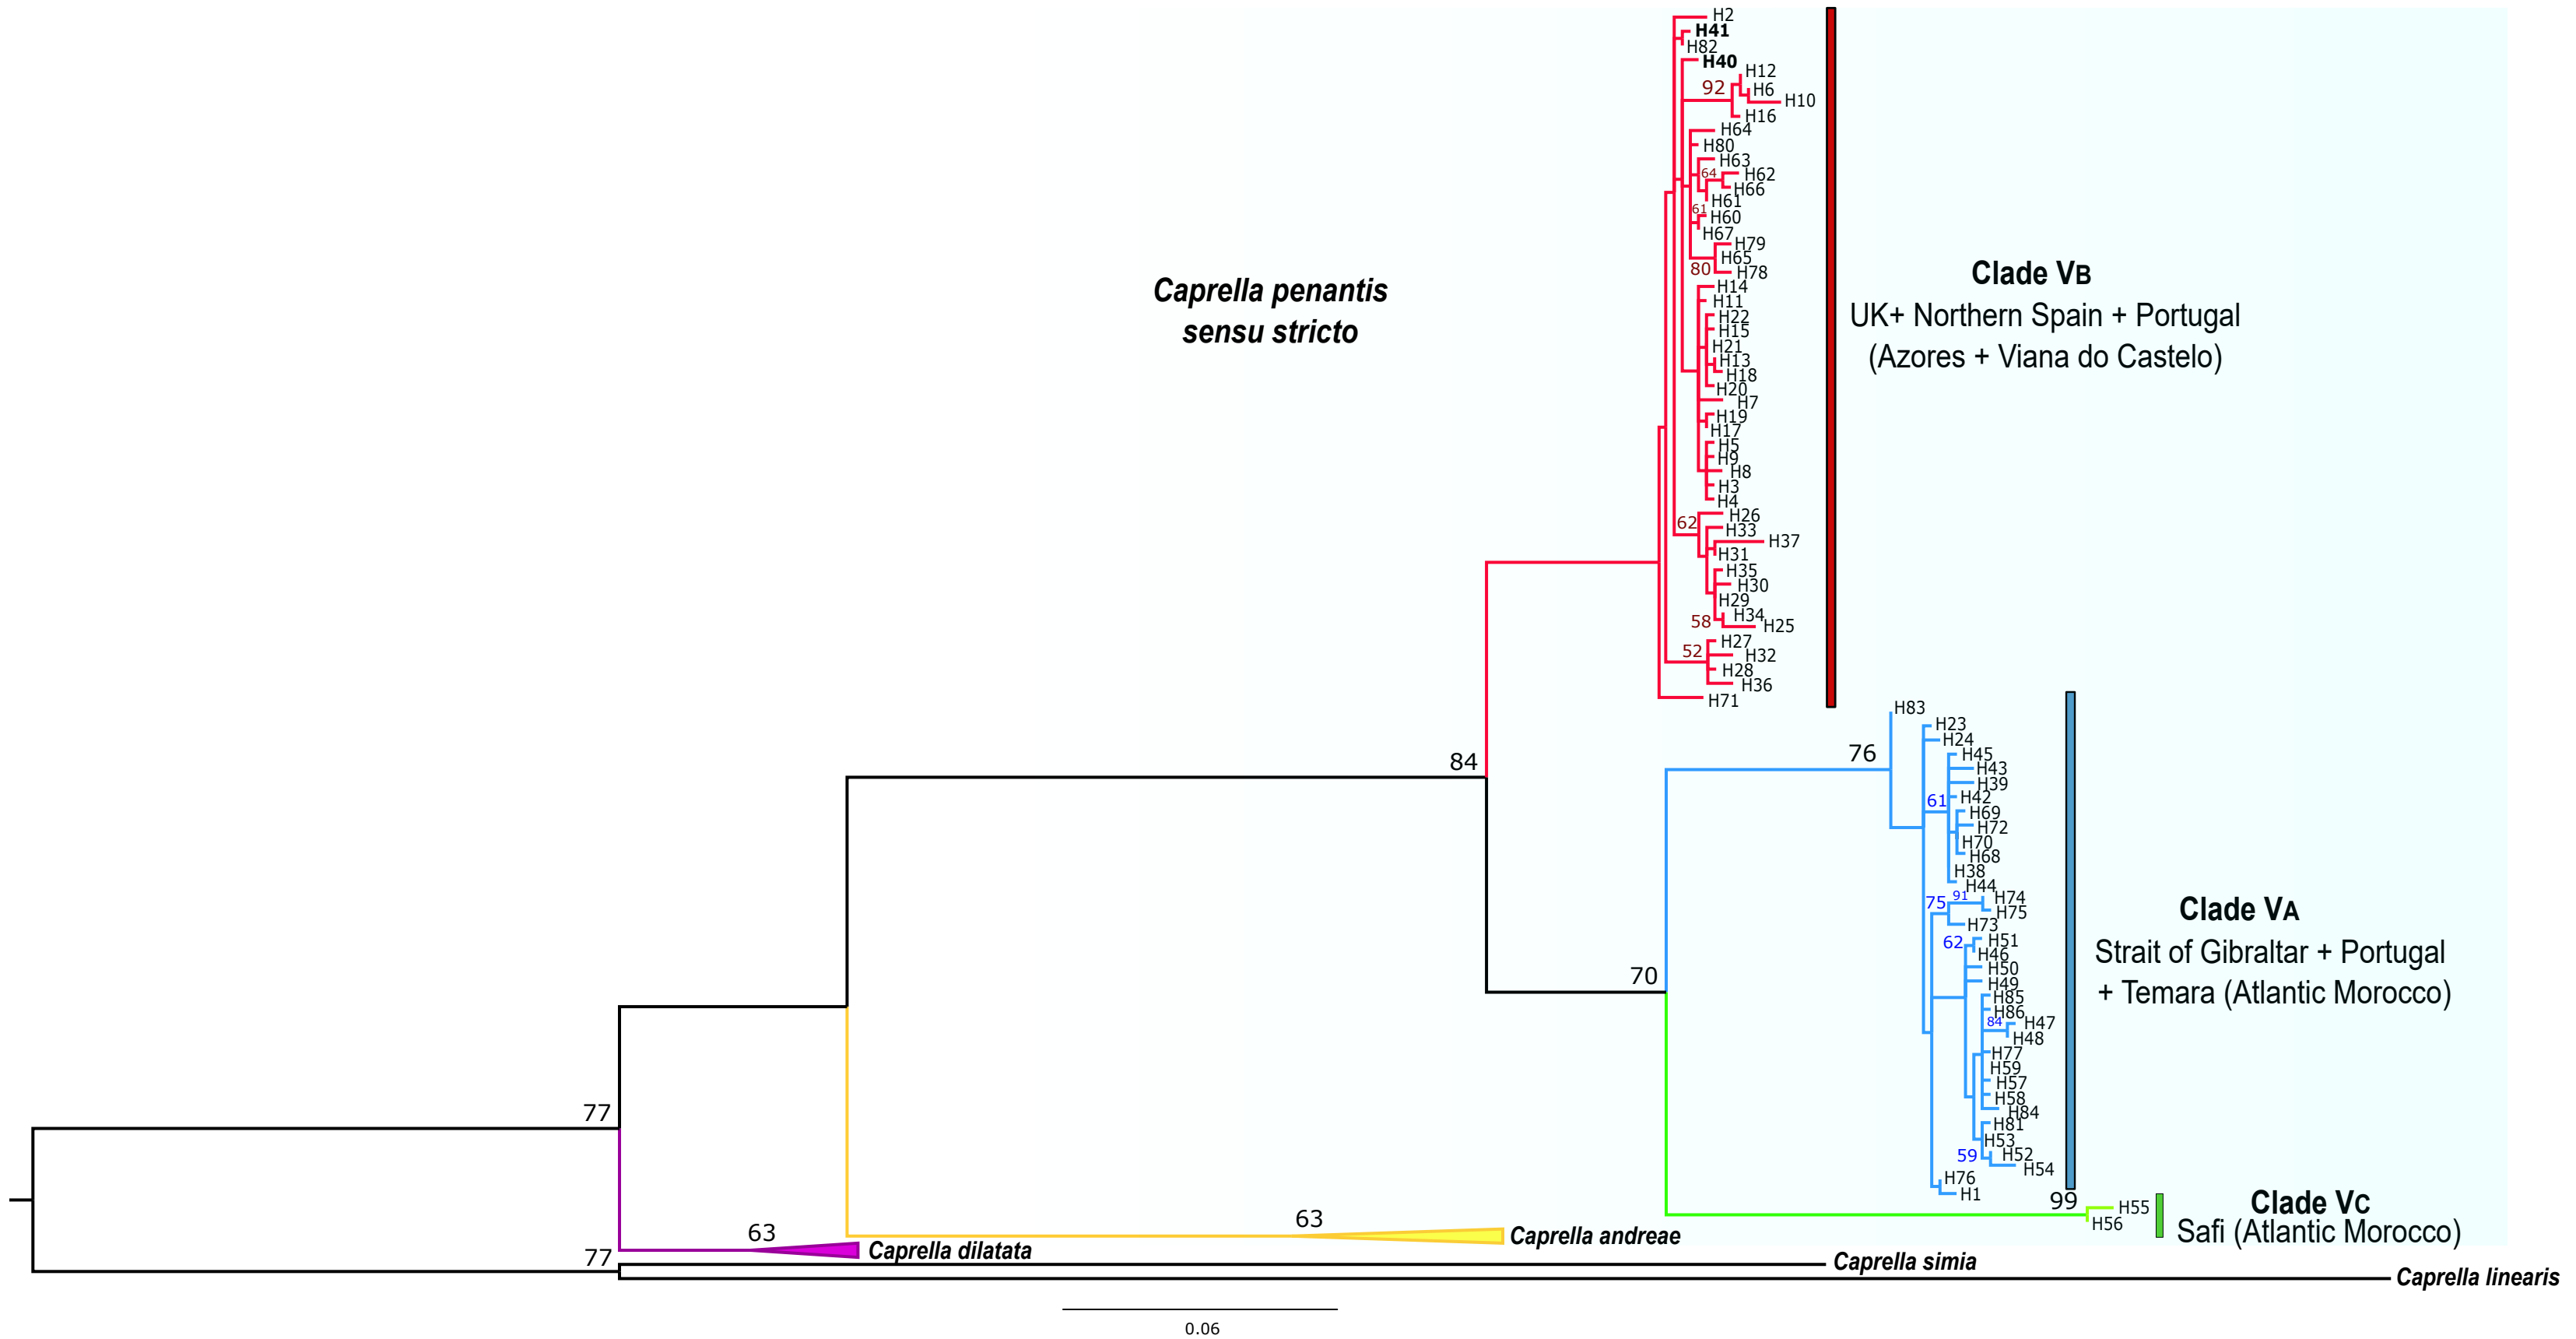

Supplement: s1 [file s1]
